# Supplementary material for: Targeting peptide iRGD-conjugated amphiphilic chitosan-co-PLA/DPPE drug delivery system for enhanced tumor therapy
Source: Royal Society of Chemistry journal article supplement (doi:10.1039/c3tb21744b), 2014-01-01
Supplement: c3tb21744b1.pdf [file c3tb21744b1.pdf]

Cite this: DOI: 10.1039/c0xx00000x

www.rsc.org/xxxxxx

ARTICLE TYPE

## Supplementary Materials

# Targeting peptide iRGD-conjugated amphiphilic chitosan-co-PLA/DPPE drug delivery system for enhanced tumor therapy

Xin Nie,<sup>a,†</sup> Jiakun Zhang,<sup>a,b,†</sup> Qing Xu,<sup>a</sup> Xiaoguang Liu,<sup>a</sup> Yaping Li,<sup>c</sup> Yan Wu<sup>a,\*</sup> and Chunying Chen <sup>a,\*</sup>

5 Received (in XXX, XXX) Xth XXXXXXXXXX 20XX, Accepted Xth XXXXXXXXXX 20XX

DOI: 10.1039/b000000x

The abstract should be a single paragraph which summarises the content of the article.

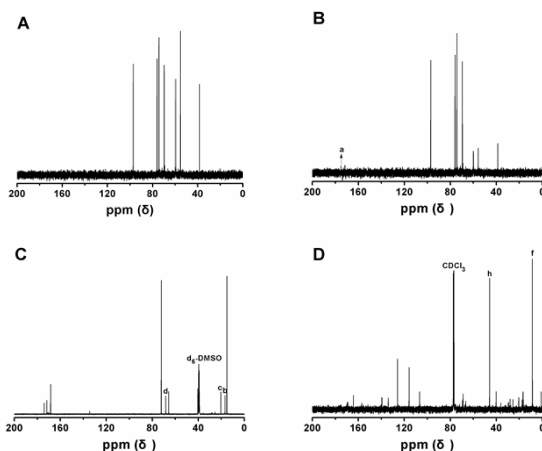

Fig. S1. <sup>13</sup>C NMR spectra of (A) CS, (B) SMCC-CS, (C) SMCC-CS-co-PLA and (D) SMCC-CS-co-PLA/DPPE.

## 1. Measurement of <sup>13</sup>C NMR and <sup>31</sup>P NMR spectra

15 <sup>13</sup>C NMR and <sup>31</sup>P NMR spectra of CS, SMCC-CS, SMCC-CS-co-PLA and SMCC-CS-co-PLA/DPPE polymers were recorded on a Bruker AVANCE 400 NMR spectrometer (Billerica, MA, USA). D<sub>2</sub>O, DMSO-*d*<sub>6</sub> and CDCl<sub>3</sub> were chosen as solvents for SMCC-CS (CS), SMCC-CS-co-PLA, SMCC-CS-co-PLA-DPPE, 20 respectively according to their different dissolubility.

## 2. Results

The <sup>13</sup>C NMR spectra of CS, SMCC-CS, SMCC-CS-co-PLA and SMCC-CS-co-PLA/DPPE polymers were shown in Supplementary Figure S1. Compared with the <sup>13</sup>C NMR spectra 25 of CS (Figure S1. A.), the new peak at ~ 174 ppm in SMCC-CS spectra (Figure S1. B.) was assigned to the new ester group from the reaction between CS and SMCC. The peak at ~ 68 ppm newly presented in the <sup>13</sup>C NMR spectra of SMCC-CS-co-PLA (Figure

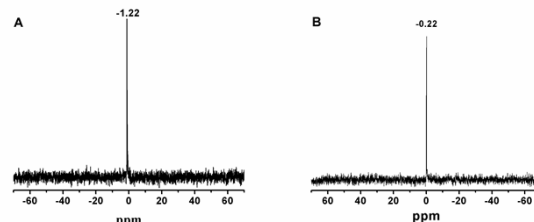

Fig. S2. <sup>31</sup>P NMR spectra of the (A) DPPE and (B) SMCC-CS-co-PLA/DPPE.

S1. C.), which indicated the -CH group carbon peak of PLA moiety located in the terminal groups. The peaks at ~ 17 and ~ 20 35 ppm attributed to the carbon peak of -CH<sub>3</sub> of the PLA moiety located in repeat units and terminal groups. These results further proved the successful conjunction of the PLA side chain to the SMCC-CS. In Figure S1. D, the peak at ~ 8.9 ppm was attributed to the terminal -CH<sub>3</sub> on DPPE. The peak at ~ 45 ppm was 40 ascribed to -CH<sub>2</sub>- on DPPE. These results indicated that the SMCC-CS-co-PLA copolymer contained PLA side chains. Furthermore, the <sup>31</sup>P NMR spectra of DPPE and SMCC-CS-co-PLA-DPPE copolymer were shown in Figure S2. The signal at ~ -1.22 ppm (Figure S2, A.) was attributed to the phosphate group 45 of DPPE. Compared with DPPE, the peak at ~ -0.22 ppm of the SMCC-CS-co-PLA-DPPE spectra (Figure S2, B.) was generally expected for <sup>31</sup>P functionalities. These data confirmed that phosphate groups were chemically bonded to the polymers.

## Notes and references

- 50 <sup>a</sup> CAS Key lab for Biomedical Effect of Nanomaterials and Nanosafety, National Center for Nanoscience and Technology, Beijing 100190, China  
<sup>b</sup> Key Laboratory of Pesticide Chemistry and Application, MOA, Institute of Plant Protection, CAAS, Beijing 100193, China  
<sup>c</sup> Shanghai Institute of Materia Medica, Chinese Academy of Sciences, 55 Shanghai 201203, China  
<sup>†</sup> Xin Nie and Jiakun Zhang contributed equally to this work.  
<sup>\*</sup>Corresponding authors.  
 Tel.: 86 10 82545560; Fax: 86 10 62656765.  
 E-mail addresses: chenchy@nanoctr.cn (C. Chen), wuy@nanoctr.cn (Y. Wu). 60

---

† Electronic Supplementary Information (ESI) available: [details of any supplementary information available should be included here]. See DOI: 10.1039/b000000x/
